# Supplementary material
Source: ML conference proceedings conference paper supplement (https://openaccess.thecvf.com/content/CVPR2023/html/Meuleman_Progressively_Optimized_Local_CVPR_2023_paper.html)
Supplement: Supplementary file 1 [file Meuleman_Progressively_Optimized_Local_CVPR_2023_supplemental.pdf]

# Progressively Optimized Local Radiance Fields for Robust View Synthesis

## Supplementary Material

Andreas Meuleman<sup>1†</sup> Yu-Lun Liu<sup>2†</sup> Chen Gao<sup>3</sup>  
Jia-Bin Huang<sup>3,4</sup> Changil Kim<sup>3</sup> Min H. Kim<sup>1</sup> Johannes Kopf<sup>3</sup>  
<sup>1</sup>KAIST <sup>2</sup>National Taiwan University <sup>3</sup>Meta <sup>4</sup>University of Maryland, College Park  
<https://localrf.github.io/>

**Codebases.** We use the following code releases for our implementation and evaluations:

- NeRF++ [9]: <https://github.com/Kai-46/nerfplusplus>
- Mega-NeRF [8]: <https://github.com/cmusatyalab/mega-nerf>
- Mip-NeRF360 [1]: <https://github.com/google-research/multinerf>
- SCNeRF [3]: <https://github.com/POSTECH-CVLab/SCNeRF>
- BARF [4]: <https://github.com/chenhsuanlin/bundle-adjusting-NeRF>
- Nerfacto [6]: <https://github.com/nerfstudio-project/nerfstudio/>
- TensoRF [2]: <https://github.com/apchenstu/TensoRF>
- COLMAP [7]: <https://github.com/colmap/colmap.git>

**Sampling details.** When rendering a ray, we get half of the samples uniformly in depth in  $[0.05, 1.05[$  and half uniformly in inverse depth in  $[1.05, 1000[$ . We use TensoRF [2]’s automatic number of sample determination and divide the results by two for faster training when radiance fields are centered around the camera poses. We set the last sample’s opacity to 1 to mitigate artifacts in regions with less coverage in the input trajectory.

**Link to video stabilization.** By smoothing the camera path, we achieve much smoother stabilization than 2D methods such as FuSta [5] as shown in the y-t slice and animation in Figure 1.

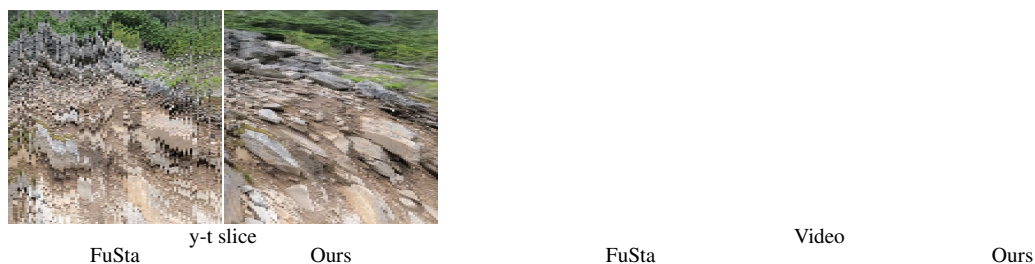

Figure 1. **Stabilization comparison.** By smoothing the camera path, we achieve more aggressive stabilization than 2D methods: our y-t slice is more consistent and our video is smoother. Please use Adobe Reader to see the animation by clicking the figure.

---

**Algorithm 1: Our optimization scheme.**

---

```
1  $j \leftarrow 1$ ; /* The first radiance fields index */
2  $p \leftarrow 1$ ;
3  $q \leftarrow 5$ ; /* Start with the first five frames */
4  $[R|t]_{p..q} \leftarrow \mathbb{1}$ ; /* Initialize poses as identity */
5  $\theta_j \leftarrow \text{initializeRF}()$ ; /* Initialize the first local radiance field */
6 while  $q < P$  do
7   while  $t_q < 1 \ \& \ q < P$  do
8      $q \leftarrow q + 1$ ;
9      $[R|t]_q \leftarrow [R|t]_{q-1}$ ; /* Append a pose at the end of the trajectory */
10     $\text{optimize}([R|t]_{p..q}, \theta_j)$ ; /* Optimize poses and radiance field */
11  end
12   $\text{optimize}([R|t]_{p..q}, \theta_j)$ ; /* Refine poses and radiance field */
13  if  $q < P$  then
14     $j \leftarrow j + 1$ ;
15     $\theta_j \leftarrow \text{initializeRF}()$ ; /* Create a new local radiance field */
16     $t_j \leftarrow t_q$ ; /* Centered around the last pose */
17     $p \leftarrow q - 30$ ; /* Stop considering the first frames */
18  end
19 end
```

---

## References

- [1] Jonathan T. Barron, Ben Mildenhall, Dor Verbin, Pratul P. Srinivasan, and Peter Hedman. Mip-nerf 360: Unbounded anti-aliased neural radiance fields. *CVPR*, 2022. 1
- [2] Anpei Chen, Zexiang Xu, Andreas Geiger, Jingyi Yu, and Hao Su. Tensorf: Tensorial radiance fields. *ECCV*, 2022. 1
- [3] Yoonwoo Jeong, Seokjun Ahn, Christopher Choy, Animashree Anandkumar, Minsu Cho, and Jaesik Park. Self-calibrating neural radiance fields. In *ICCV*, 2021. 1
- [4] Chen-Hsuan Lin, Wei-Chiu Ma, Antonio Torralba, and Simon Lucey. Barf: Bundle-adjusting neural radiance fields. In *ICCV*, 2021. 1
- [5] Yu-Lun Liu, Wei-Sheng Lai, Ming-Hsuan Yang, Yung-Yu Chuang, and Jia-Bin Huang. Hybrid neural fusion for full-frame video stabilization. In *ICCV*, 2021. 1
- [6] Evonne Ng\*, Ruilong Li Brent Yi Terrance Wang Alexander Kristoffersen Jake Austin Kamyar Salahi Abhik Ahuja David McAllister Angjoo Kanazawa Matthew Tancik\*, Ethan Weber\*. Nerfstudio: A framework for neural radiance field development, 2022. 1
- [7] Johannes Lutz Schönberger and Jan-Michael Frahm. Structure-from-motion revisited. In *CVPR*, 2016. 1
- [8] Haithem Turki, Deva Ramanan, and Mahadev Satyanarayanan. Mega-nerf: Scalable construction of large-scale nerfs for virtual fly-throughs. In *CVPR*, 2022. 1
- [9] Kai Zhang, Gernot Riegler, Noah Snavely, and Vladlen Koltun. Nerf++: Analyzing and improving neural radiance fields. *arXiv:2010.07492*, 2020. 1

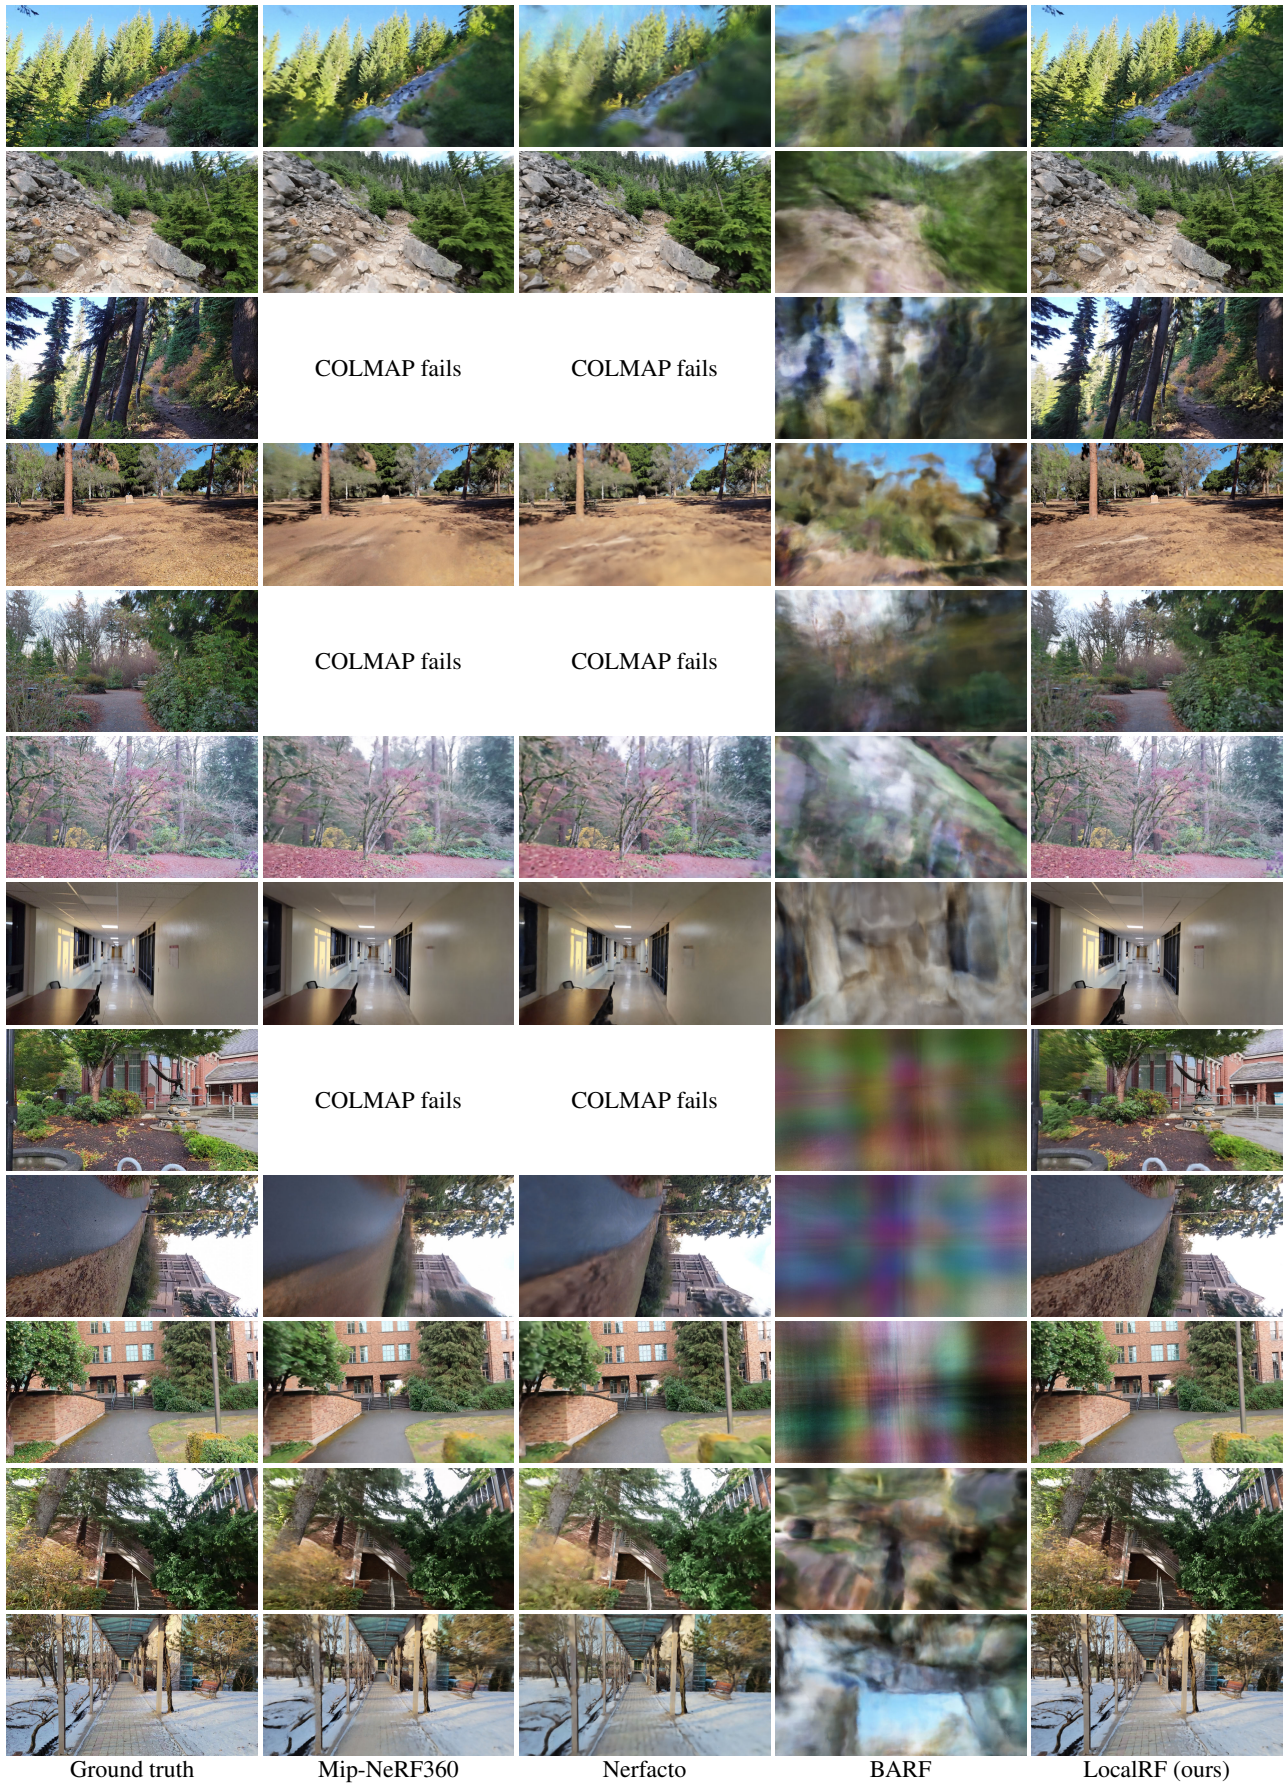

Figure 2. Novel view synthesis results on the STATIC HIKES dataset.
